# Supplementary material for: Biomass-derived phosphorus-doped carbon materials as efficient metal-free catalysts for selective aerobic oxidation of alcohols
Source: Royal Society of Chemistry journal article supplement (doi:10.1039/c9gc01910c), 2019-01-01
Supplement: c9gc01910c1.pdf [file c9gc01910c1.pdf]

## **Biomass-Derived Phosphorus-Doped Carbon Materials as Efficient Metal-Free Catalysts for Selective Aerobic Oxidation of Alcohols**

Xiwei Hu, Mengying Fan, Yangyang Zhu, Qian Zhu, Qiang Song and Zhengping Dong\*

College of Chemistry and Chemical Engineering, Gansu Provincial Engineering Laboratory for Chemical Catalysis, Laboratory of Special Function Materials and Structure Design of the Ministry of Education, Lanzhou University, Lanzhou 730000, PR China

E-mail address: dongzhp@lzu.edu.cn (Zhengping Dong), Tel: 86 931 8912577.

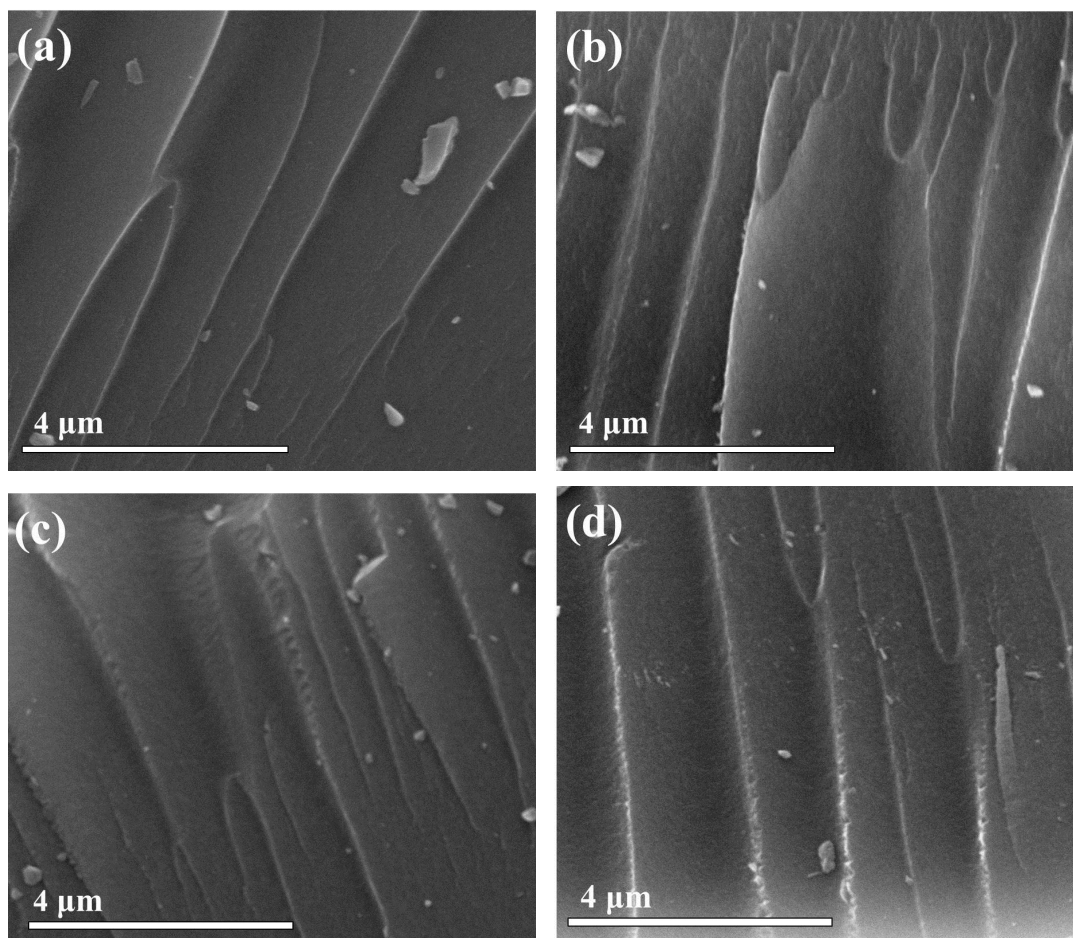

**Fig. S1.** SEM images of PC-500 (a), PC-600 (b), PC-700 (c) and PC-800 catalysts (d).

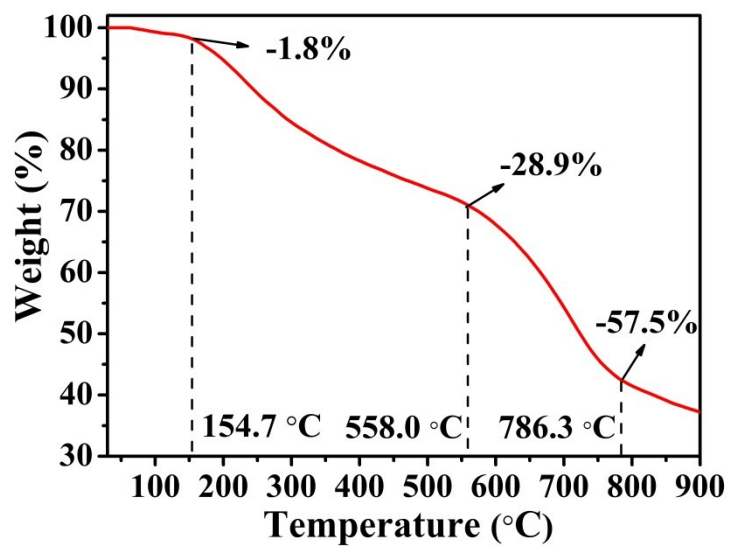

Fig. S2. TGA curve of PC.

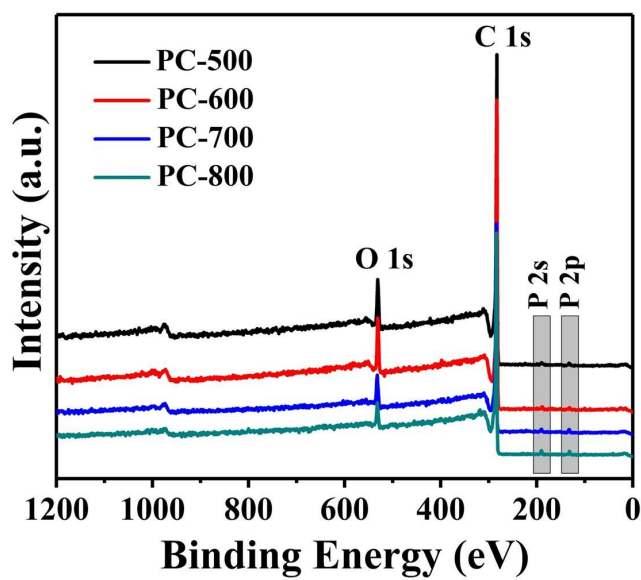

Fig. S3. The wide scan spectra of PC-500, PC-600, PC-700 and PC-800 catalysts.

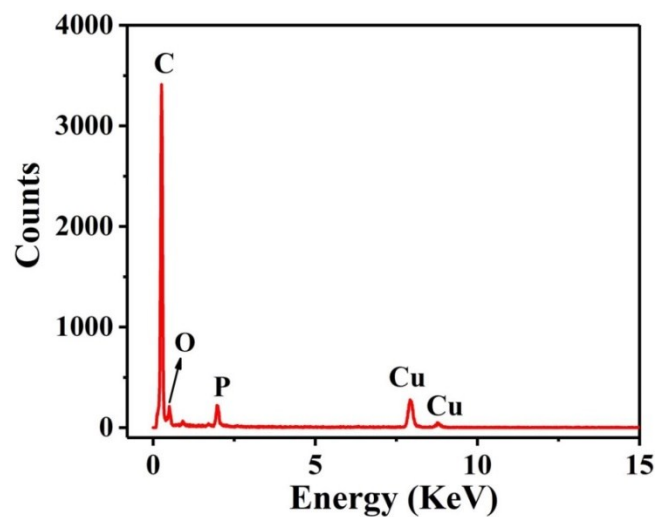

**Fig. S4.** The EDX spectrum of PC-700 catalyst.

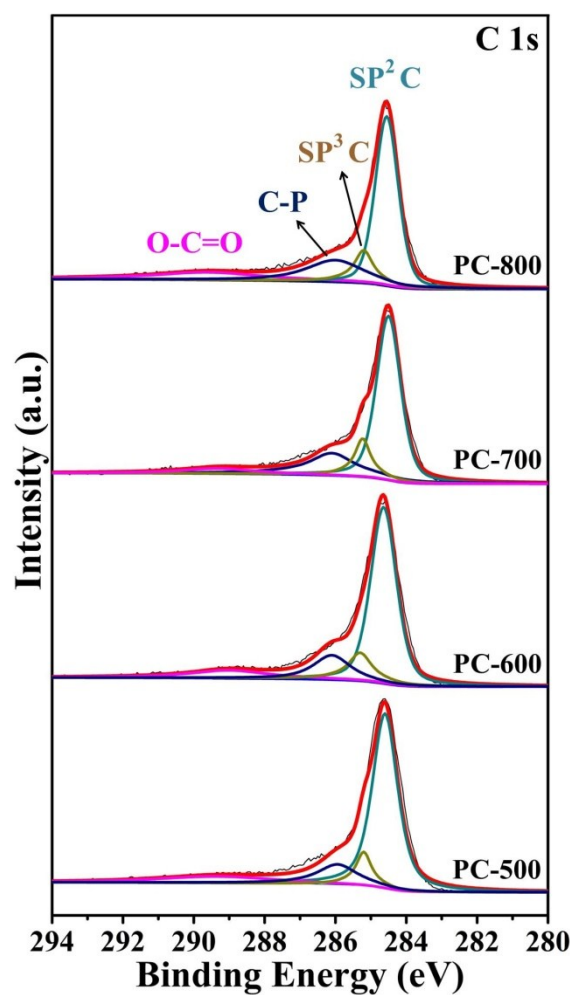

**Fig. S5.** XPS C 1s spectra of PC-X catalysts, i.e., PC-500, PC-600, PC-700 and PC-800, respectively.

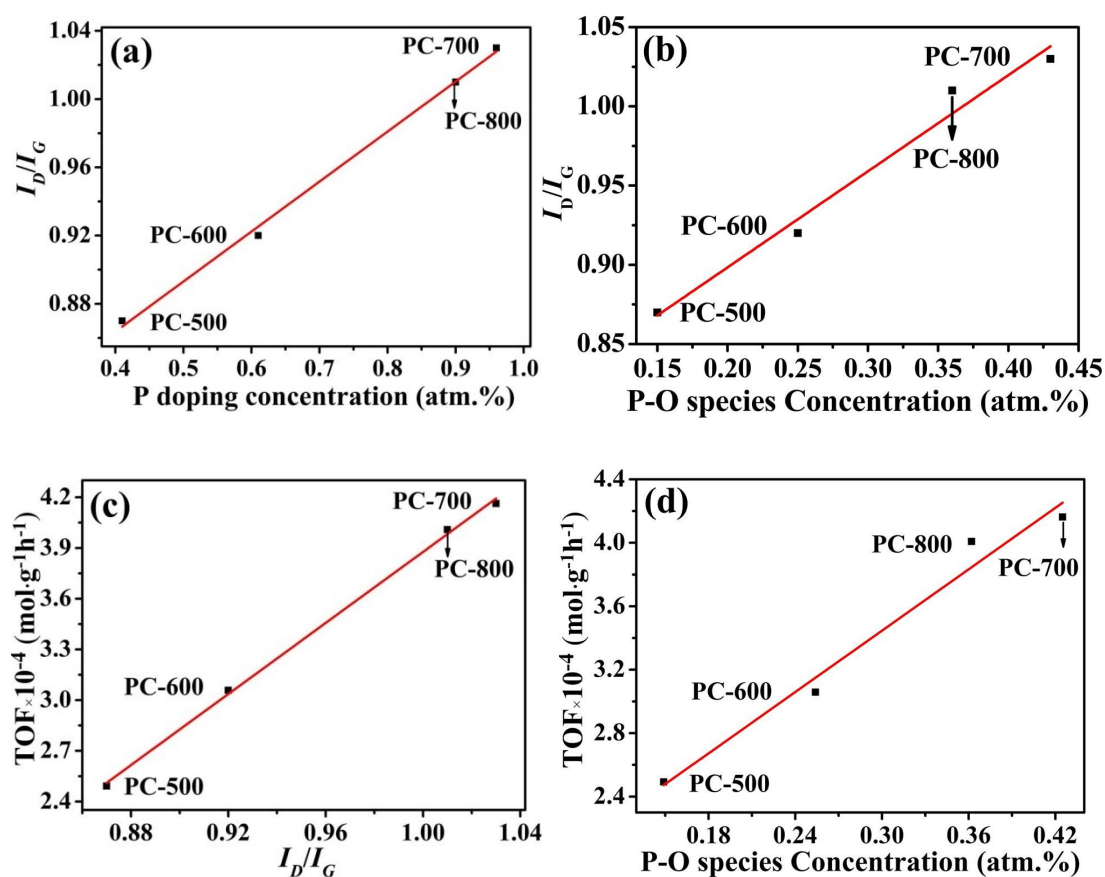

**Fig.S6.** (a) Linear correlation between the P doping concentration and the values of  $I_D/I_G$ . (b) Linear correlation between the P-O species concentration and the values of  $I_D/I_G$  (c) Linear correlation between the values of  $I_D/I_G$  and TOF values in aerobic oxidation of benzyl alcohol. (d) Linear correlation between the P-O species concentration and TOF values in aerobic oxidation of benzyl alcohol.

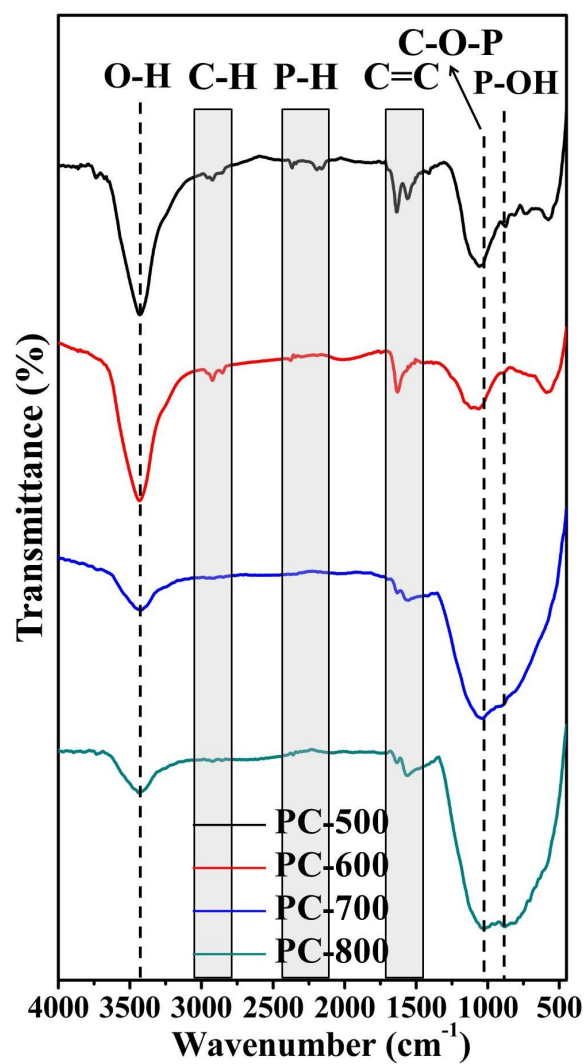

**Fig.S7.** The FT-IR spectra of PC-500, PC-600, PC-700 and PC-800 catalysts.

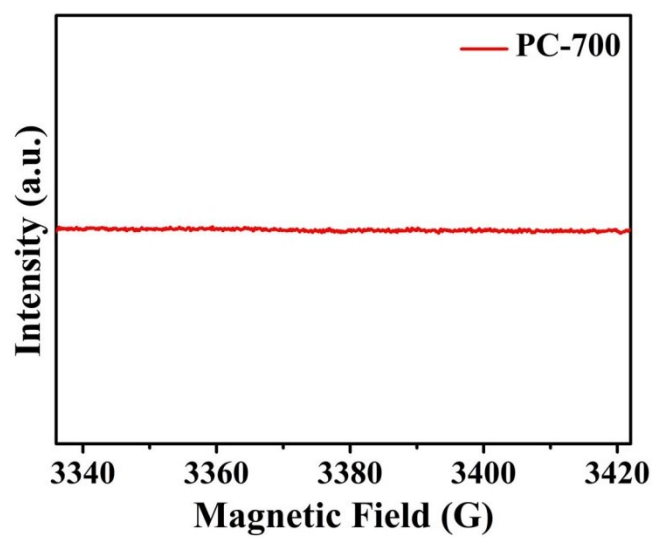

**Fig.S8.** EPR spectra of aerobic oxidation of benzyl alcohol catalyzed by PC-700 catalyst.

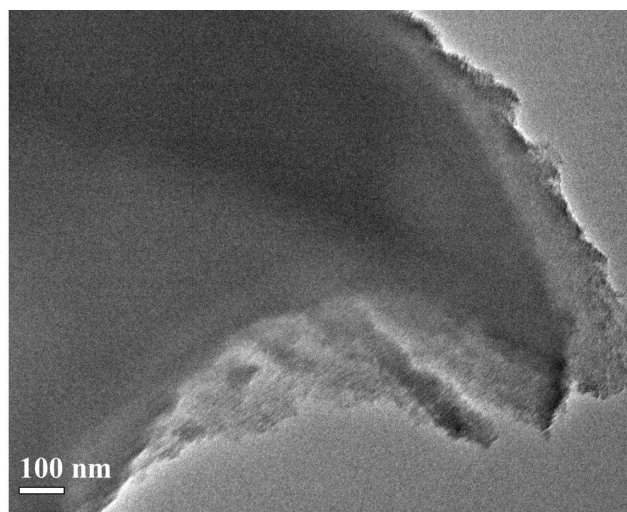

**Fig. S9.** TEM image of reused PC-700 catalyst.

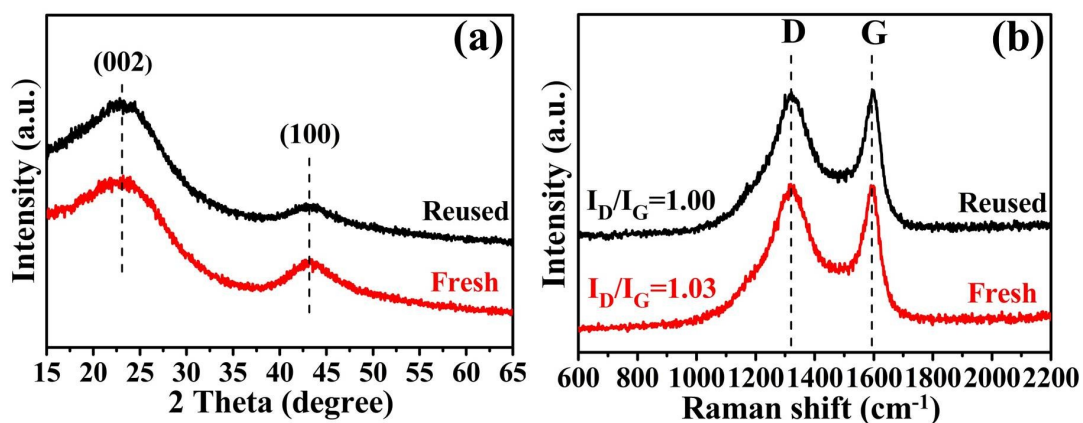

**Fig. S10.** The comparison between fresh and reused PC-700 catalyst in PXRD patterns (a) and Raman spectra (b).

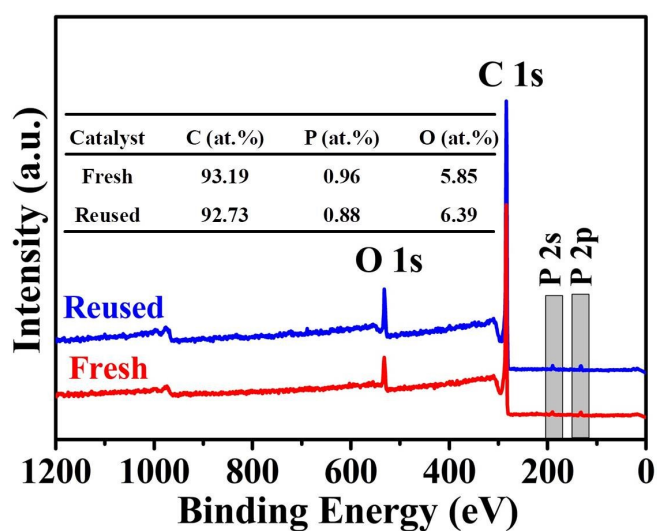

**Fig. S11.** The comparison between fresh and reused PC-700 catalyst of the contents of C, O and P in XPS wide scan spectrum.

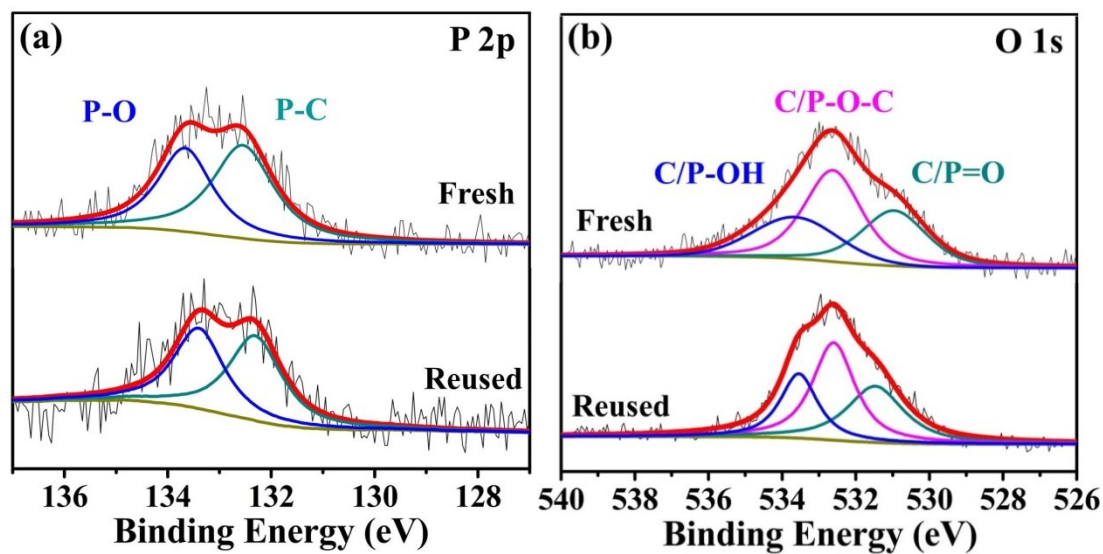

**Fig. S12.** The comparison between fresh and reused PC-700 catalyst in P 2p (a) and O 1s (b) spectra.

**Table S1.** Texture parameters of prepared PC catalysts and the comparison of catalytic performance in aerobic oxidation of benzyl alcohol.

| Entry | Samples | BET surface area ( $\text{m}^2 \text{g}^{-1}$ ) | Pore volume ( $\text{cm}^3 \text{g}^{-1}$ ) | Average pore size (nm) | Yield/Sel. (%) | TOF ( $\text{mol} \cdot \text{g}^{-1} \text{h}^{-1}$ ) <sup>b</sup> |
|-------|---------|-------------------------------------------------|---------------------------------------------|------------------------|----------------|---------------------------------------------------------------------|
| 1     | PC-500  | 1627.3                                          | 0.87                                        | 2.13                   | 59.8/>99       | $2.49 \times 10^{-4}$                                               |
| 2     | PC-600  | 1878.4                                          | 0.97                                        | 2.06                   | 73.4/>99       | $3.06 \times 10^{-4}$                                               |
| 3     | PC-700  | 1612.9                                          | 0.79                                        | 1.96                   | 99.9/>99       | $4.16 \times 10^{-4}$                                               |
| 4     | PC-800  | 1821.5                                          | 0.93                                        | 2.04                   | 96.2/>99       | $4.01 \times 10^{-4}$                                               |

**Table S2.** The calculated different types of oxygen containing species in PC-500, PC-600, PC-700 and PC-800 catalysts.

| Entry | Catalyst | Total O [at. %] | Calculated [at. %] |         |        |
|-------|----------|-----------------|--------------------|---------|--------|
|       |          |                 | C/P=O              | C/P-O-C | C/P-OH |
| 1     | PC-500   | 7.54            | 2.22               | 3.08    | 2.24   |
| 2     | PC-600   | 6.88            | 2.19               | 2.54    | 2.15   |
| 3     | PC-700   | 5.85            | 1.73               | 2.61    | 1.51   |
| 4     | PC-800   | 3.52            | 1.00               | 1.54    | 0.98   |

**Table S3.** The calculated contents of P-containing species of fresh and reused PC-700 catalysts based on the high-resolution P 2p spectra.

| Entry | Catalyst      | Total P [at. %] | Calculated [at. %] |      |
|-------|---------------|-----------------|--------------------|------|
|       |               |                 | P-C                | P-O  |
| 1     | Fresh PC-700  | 0.96            | 0.53               | 0.43 |
| 2     | Reused PC-700 | 0.88            | 0.47               | 0.41 |

**Table S4.** The calculated contents of P-containing species of fresh and reused PC-700 catalysts based on the high-resolution O 1s spectra.

| Entry | Catalyst      | Total O [at. %] | Calculated [at. %] |         |        |
|-------|---------------|-----------------|--------------------|---------|--------|
|       |               |                 | C/P=O              | C/P-O-C | C/P-OH |
| 1     | Fresh PC-700  | 5.85            | 1.73               | 2.61    | 1.51   |
| 2     | Reused PC-700 | 6.39            | 2.10               | 2.72    | 1.57   |
